# Supplementary material
Source: Springer Nature journal article supplement (https://www.springermedizin.de/resource/supplementary/12986_2011_333_MOESM3_ESM.pdf/25655858)

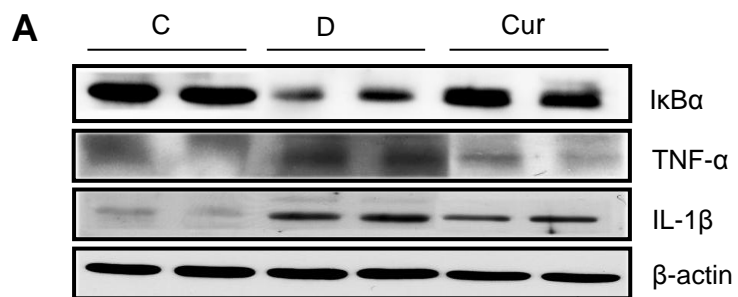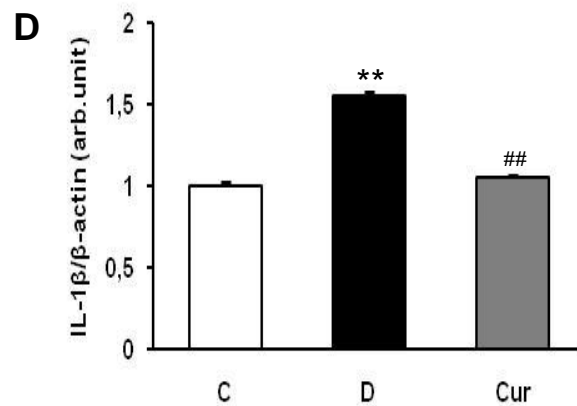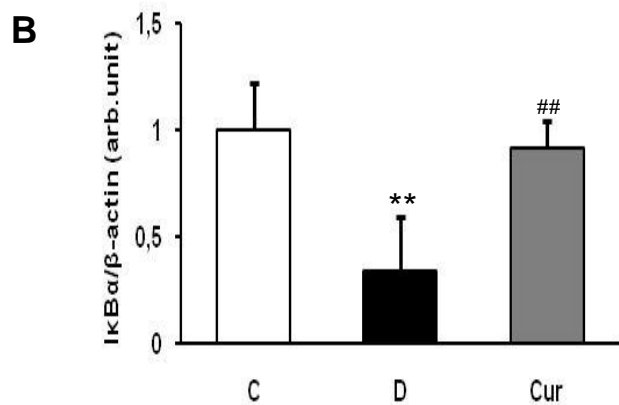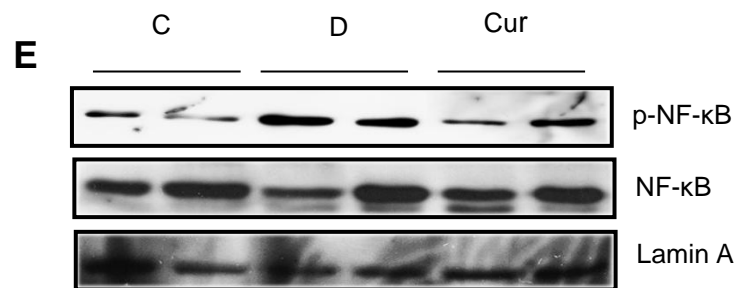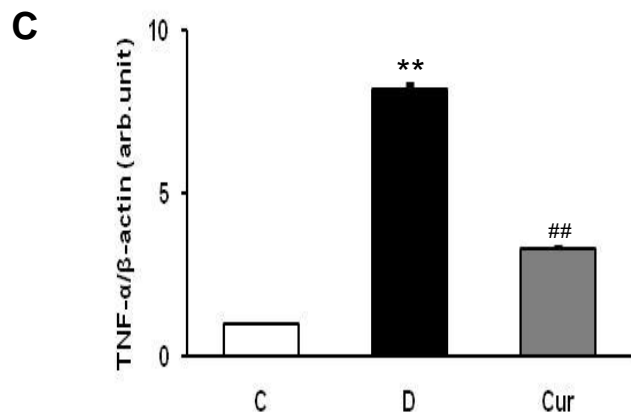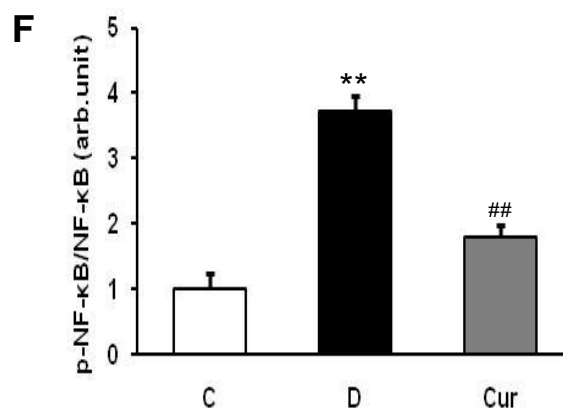

Supplement: MOESM3 [file 25655858]
